# Supplementary material for: A sensitive electrogenerated chemiluminescence biosensor for galactosyltransferase activity analysis based on a graphitic carbon nitride nanosheet interface and polystyrene microsphere-enhanced responses
Source: Royal Society of Chemistry journal article supplement (doi:10.1039/c6ra05249e), 2016-01-01
Supplement: c6ra05249e1.pdf [file c6ra05249e1.pdf]

## Supporting Information

**Sensitive Electrogenerated Chemiluminescence Biosensor for  
Galactosyltransferases Activity Analysis Based on Graphitic Carbon Nitride  
Nanosheet Interface and Polystyrene Microsphere Enhanced Responses**

Saidan Xie<sup>a,b</sup>, Feng Wang<sup>a</sup>, Zhaoyan Wu<sup>b\*</sup>, Lokesh Joshi<sup>c</sup>, Yang Liu<sup>a\*</sup>

<sup>a</sup>Department of Chemistry, Beijing Key Laboratory for Analytical Methods and Instrumentation, Tsinghua University, Beijing 100084, China

<sup>b</sup>State Key Laboratory of Chemo/Biosensing and Chemometrics, College of Chemistry and Chemical Engineering, Hunan University, Changsha 410082, People's Republic of China

<sup>c</sup>Alimentary Glycoscience Research Cluster, National Centre for Biomedical Engineering Science, National University of Ireland, Galway, Ireland

\*to whom corresponding should be addressed.

Tel: 86-10-62798187; Fax: 86-10-62771149

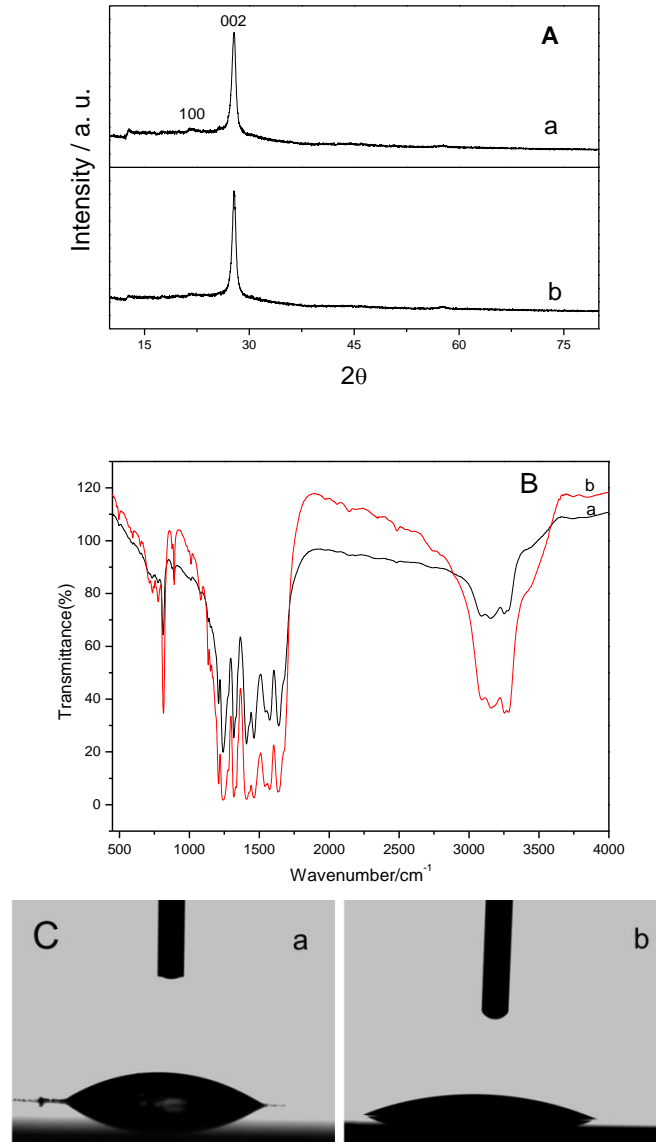

Figure S1 The XRD (A), FT-IR spectra (B) and Contact angle patterns (C) of bulk  $g\text{-C}_3\text{N}_4$  (a) and carboxylated  $g\text{-C}_3\text{N}_4$ .

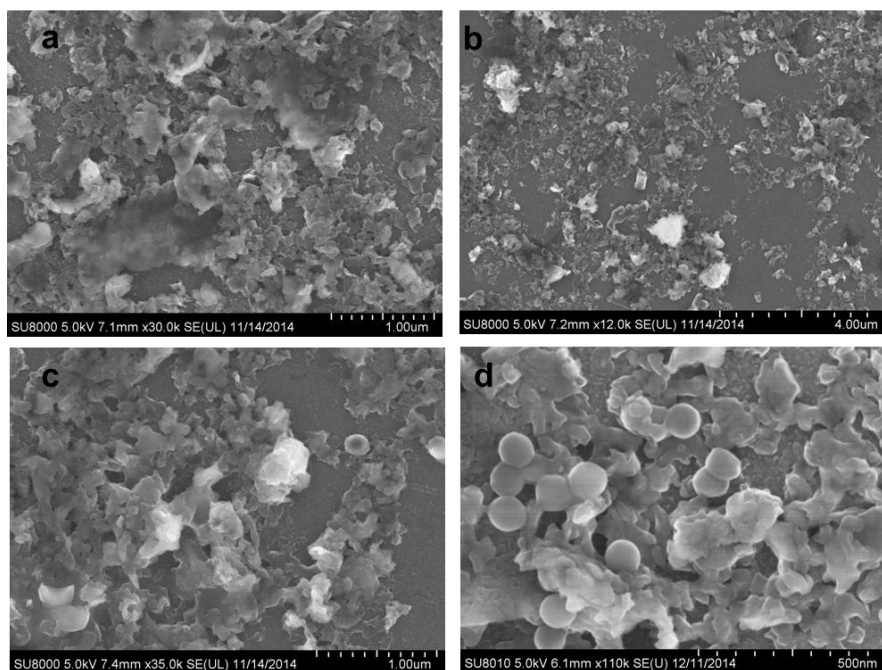

Figure S2 The SEM pictures of g-C<sub>3</sub>N<sub>4</sub>/GCE(a), (b) GlcNAc-BSA/g-C<sub>3</sub>N<sub>4</sub>/GCE, (c) PSM-AIA/GlcNAc-BSA/g-C<sub>3</sub>N<sub>4</sub>/GCE, and (d) PSM-AIA/Gal/GlcNAc-BSA/g-C<sub>3</sub>N<sub>4</sub>/GCE, The concentration of  $\beta$ -1,4-galactosyl-transferase was 0.01 U mL<sup>-1</sup>.

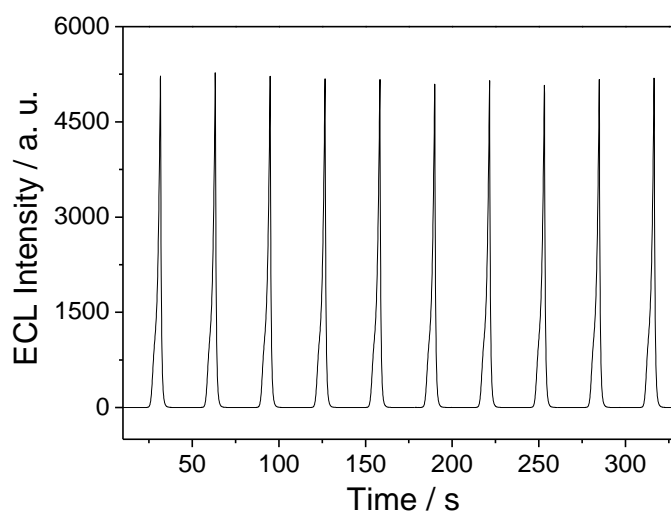

Figure S3 The ECL response of PSM-AIA/Gal/GlcNAc-BSA/g-C<sub>3</sub>N<sub>4</sub>/GCE under continuous scanning for 10 cycles in 0.1 M PBS containing 20 mM K<sub>2</sub>S<sub>2</sub>O<sub>8</sub> and 0.1 M KCl. The concentration of  $\beta$ -1,4-galactosyltransferase is 0.01 U mL<sup>-1</sup>. The PMT voltage is 600 V

**Table 1.** Comparison of the linear range and detect limit for Gal T using different methods.

| Probe | Linear range<br>(mUmL <sup>-1</sup> ) | Detection limit<br>(mUmL <sup>-1</sup> ) | Refs |
|-------|---------------------------------------|------------------------------------------|------|
| ELISA | 0.5 - 2                               | 0.5                                      | 1    |

|              |          |      |           |
|--------------|----------|------|-----------|
| fluorescence | 0.94-15  | 0.94 | 2         |
| HPLC         |          |      |           |
| ECL          | 0.5 - 50 | 0.07 | This work |

---

#### References

1. M. Oubihi, K. Kitajima, K. Kobayashi, T. Adachi, N. Aoki, T. Matsuda, *Anal. Biochem.*, 257 (1998) 169-175.
2. K. R. Anumula, *Glycobiology*, 22 (2012) 912-917.
